# Supplementary material for: Morphology and Molecular Composition of Purified Bovine Viral Diarrhea Virus Envelope
Source: PubMed Central journal article supplement (PMC4777508; doi:10.1371/journal.ppat.1005476), 2016-03-03
Supplement: ppat.1005476.s011.pdf [file ppat.1005476.s011.pdf]

A

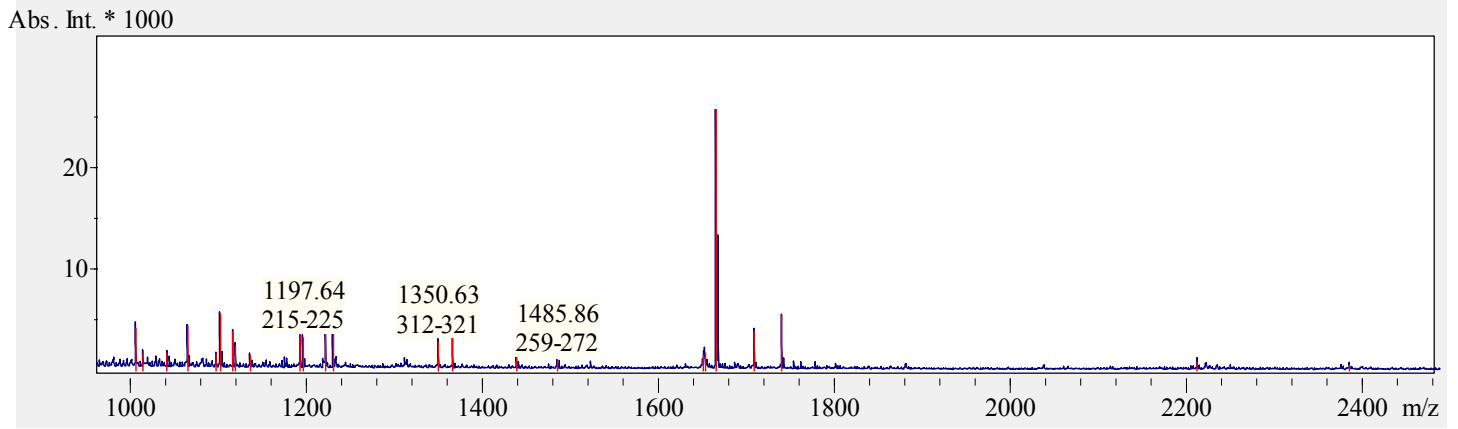

B

Protein View | Match Errors | MS/MS Fragments | MSMS Analysis

Protein:  Peak threshold: 0.0

Intensity coverage: 3.3% (7374 cnts) Sequence coverage MS: 9.4% Sequence coverage MS/MS: 0.0% pI: 8.6 MW (kDa): 43.3

| 10         | 20         | 30         | 40         | 50         | 60          | 70         | 80         | 90         | 100        | 110        | 120        |
|------------|------------|------------|------------|------------|-------------|------------|------------|------------|------------|------------|------------|
| DLNCKPDYSY | AIAKSDRVGP | LGAEDLTTIW | KDYSQEMTLE | DIMVIANCKD | GKFFVYLPRCT | RETRYLATLH | SRALPTNVVF | EKLFEGLRQG | DTVEMEDNFE | FGLCPCDAKP | IVRGRFNITL |
| 130        | 140        | 150        | 160        | 170        | 180         | 190        | 200        | 210        | 220        | 230        | 240        |
| LNGSAFQMYC | PIGWIGSVSC | MLANRDILKT | AVVRTYRRSK | PFYRQGCIT  | QKTLGEDLYN  | CDLGGNNTCV | TGDQLQYTG  | SIESCWCWGF | KFQKSEGLPH | YPIGKCRLN  | ETGYRLVDGT |
| 250        | 260        | 270        | 280        | 290        | 300         | 310        | 320        | 330        | 340        | 350        | 360        |
| SCNREGVAIV | PIGQVKCKIG | DTIVQVIALD | TKLGPMPCKP | HEIISSEGPV | EKTACTFNVT  | KILKNKYFEP | RDSYFQQYML | RGEYQYWFDL | EVIDHHRDYF | AESILVVVVA | LLGGRYVLWL |
| 370        | 380        |            |            |            |             |            |            |            |            |            |            |
| LVTYMLVLEQ | KALG       |            |            |            |             |            |            |            |            |            |            |
