# Supplementary material for: Morphology and Molecular Composition of Purified Bovine Viral Diarrhea Virus Envelope
Source: PubMed Central journal article supplement (PMC4777508; doi:10.1371/journal.ppat.1005476), 2016-03-03

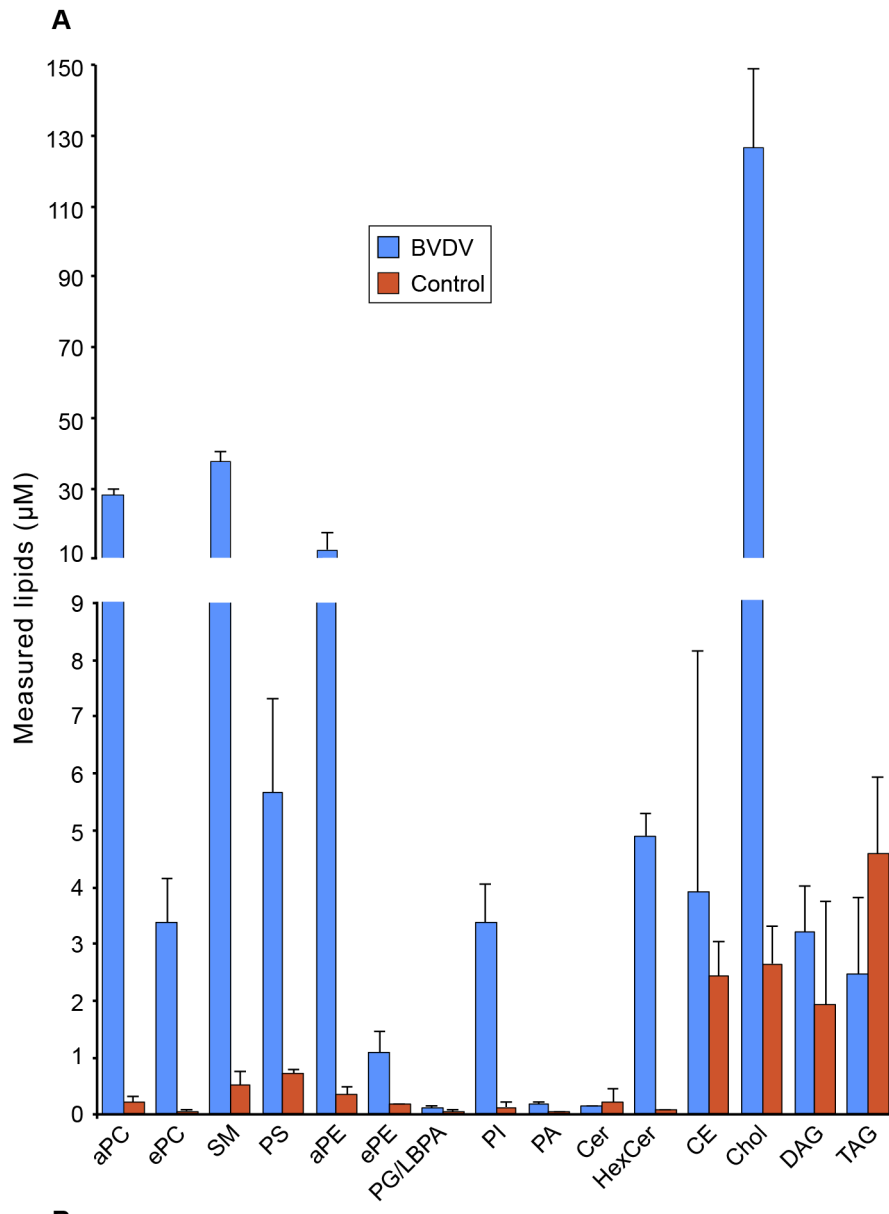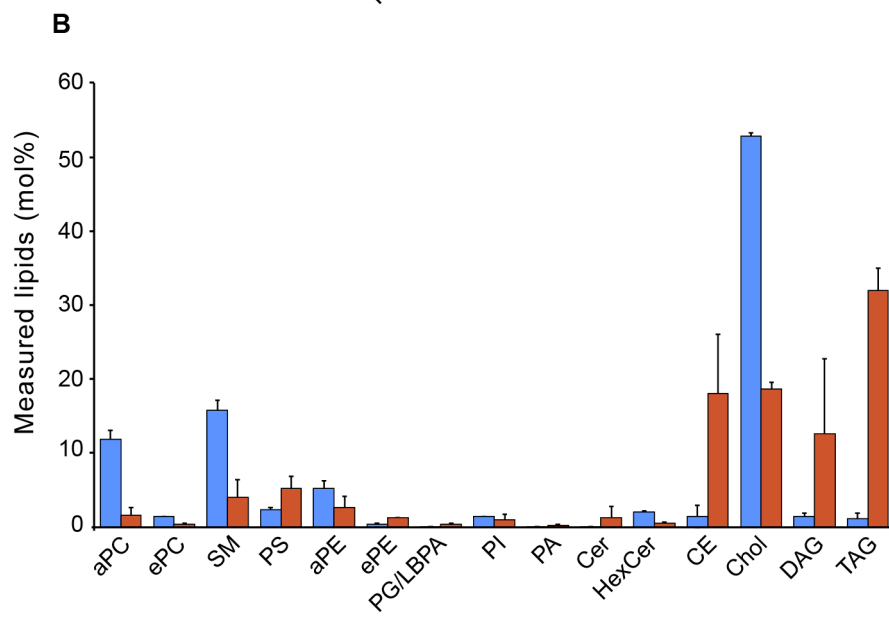

Supplement: ppat.1005476.s012.pdf [file ppat.1005476.s012.pdf]
